# Supplementary material for: Developing tough, fatigue-resistant and conductive hydrogels via in situ growth of metal dendrites
Source: Royal Society of Chemistry journal article supplement (doi:10.1039/d4mh01778a), 2025-01-01
Supplement: d4mh01778a1.pdf [file d4mh01778a1.pdf]

## Supplementary Information

*for*

### **Developing Tough, Fatigue-Resistant and Conductive Hydrogels by In-Situ Growing Metal Dendrites**

Mengjie Si<sup>a, +</sup>, Yueman Tang<sup>a, +</sup>, Chen Xu<sup>a</sup>, Chen Yu Li<sup>b, \*</sup>, Kaishun Xia<sup>c</sup>, Wei Xu<sup>d</sup>,  
Ji Lin<sup>e</sup>, Zhen Jiang<sup>f</sup>, Jintao Yang<sup>a</sup>, and Si Yu Zheng<sup>a, \*</sup>

<sup>a</sup> College of Materials Science & Engineering, Zhejiang University of Technology, Hangzhou 310014, P. R. China

<sup>b</sup> Research Center for Humanoid Sensing, Zhejiang Lab, Hangzhou 311100, P. R. China

<sup>c</sup> Department of Orthopedics, The Second Affiliated Hospital, Zhejiang University, Hangzhou, 310009, P. R. China

<sup>d</sup> ZJU-Hangzhou Global Scientific Center, Zhejiang University, Hangzhou 311200, P. R. China

<sup>e</sup> School of Mechanical Engineering & Mechanics, Ningbo University, Ningbo 315211, P. R. China

<sup>f</sup> School of Mechanical Materials, Mechatronic and Biomedical Engineering, University of Wollongong, Wollongong, NSW 2522, Australia

<sup>+</sup> These authors contributed equally to this work.

<sup>\*</sup> E-mail of corresponding author: Chen Yu Li (lcyzju@163.com) and Si Yu Zheng (zhengsiyu@zjut.edu.cn)

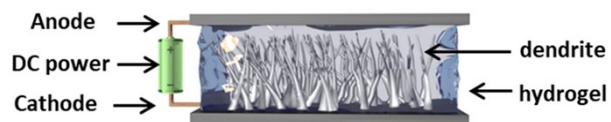

**Fig. S1.** Schematic diagram to present the method to grow Sn dendrites in gel.

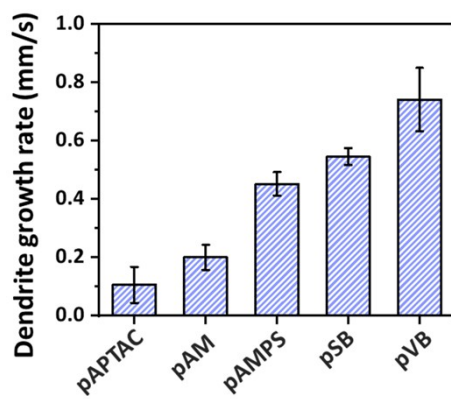

**Fig. S2.** Dendrite growth rates in hydrogels with different polymer structures at 10 V (Concentration of  $\text{SnCl}_2$  solution: 2 M).

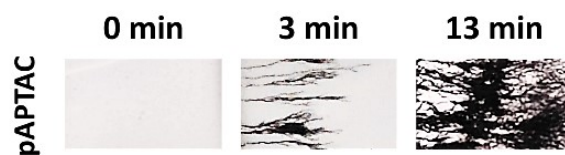

**Fig. S3.** Image of pAPTAC gel after growing Sn dendrite for different time at 10 V.

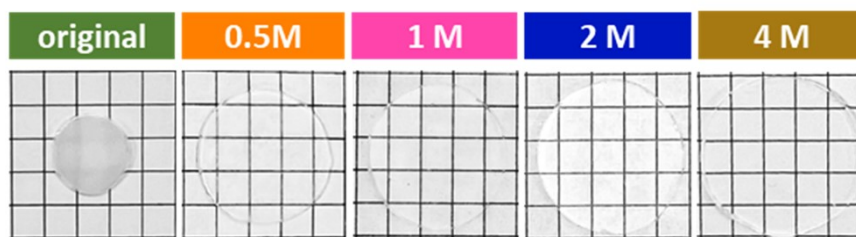

**Fig. S4.** Digital images of pVB gel after swelling in SnCl<sub>2</sub> solution with different concentrations.

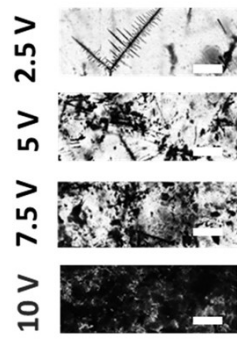

**Fig. S5.** Polarizing microscopic images to show the dendrites grown density in gel at different voltages after growing for 80 s.

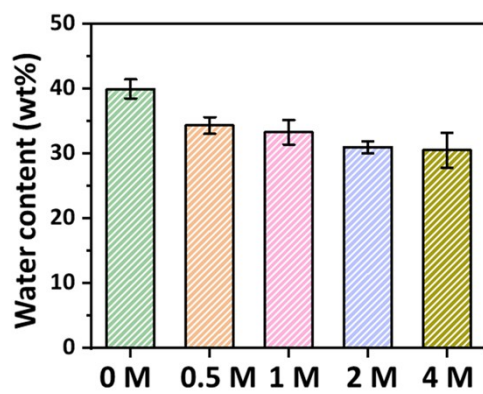

**Fig. S6.** The water content of pVB@xSn gels, prepared by swelling in SnCl<sub>2</sub> solution with different concentrations and then balanced in water.

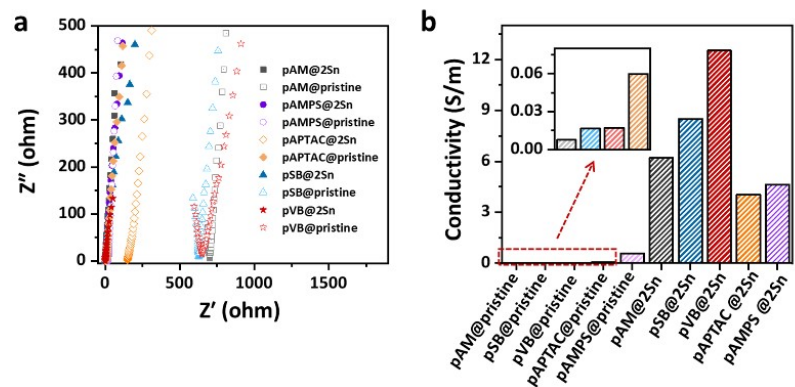

**Fig. S7.** The (a) EIS spectroscopy and (b) conductivity of pristine/dendrite composite gels with different molecular structures.



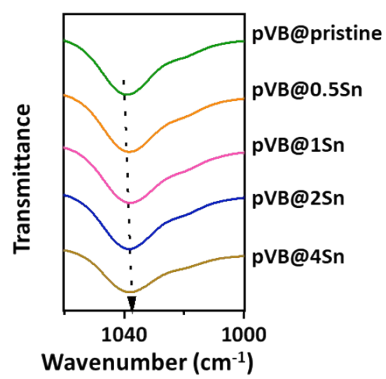

**Fig. S8.** FTIR spectra of pVB@pristine and pVB@xSn gels (x=0.5, 1, 2 and 4).

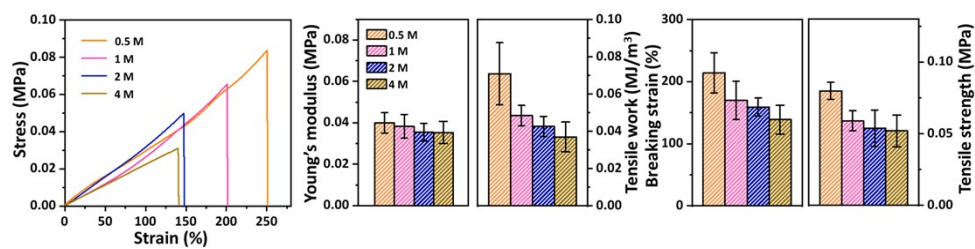

**Fig. S9.** The tensile stress-strain curves of pVB gels after swelling in SnCl<sub>2</sub> solutions with different concentrations; corresponding Young's modulus, tensile work, breaking strain and tensile strength.

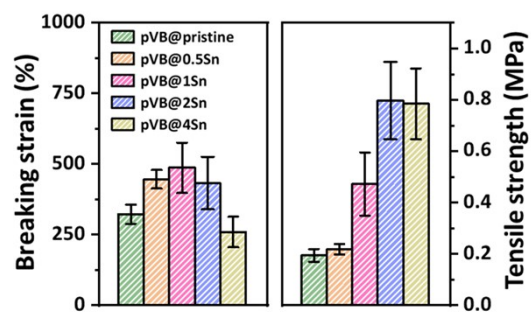

**Fig. S10.** Calculated tensile strength and breaking strain of pVB@xSn gels after equilibrium in water.

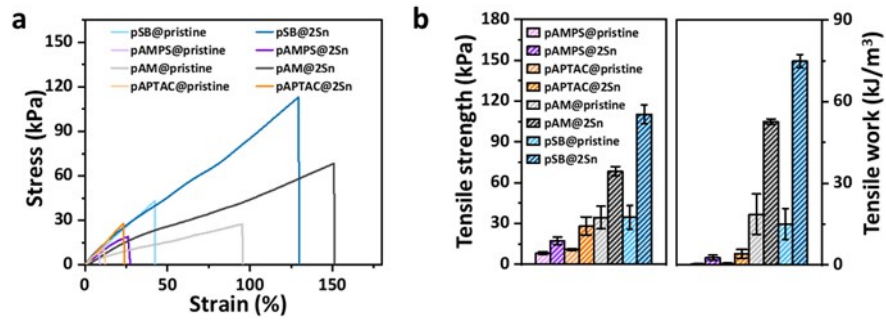

**Fig. S11.** (a) Tensile curves of dendrite composite gels with different molecular structures, and (b) the corresponding tensile strength and tensile work.

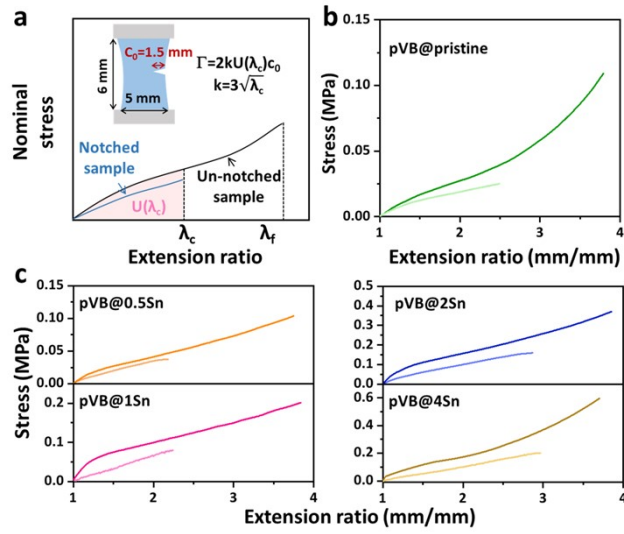

**Fig. S12.** (a) Method for evaluating fracture toughness using a single notch test. (b, c) Stress-extension ratio curves of (b) pVB@pristine and (c) pVB@xSn gels with/without notch in single notched sample tests.

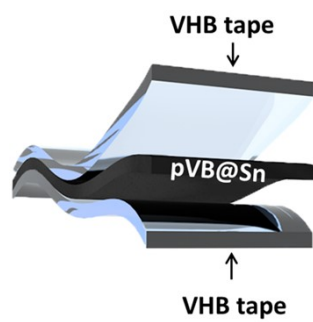

**Fig. S13.** Schematic to illustrate the structure of pVB@2Sn gel based sensor.

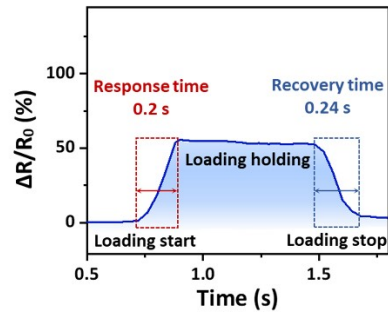

**Fig. S14.** Response and recovery time of the pVB@2Sn gel sensor under 20% strain.

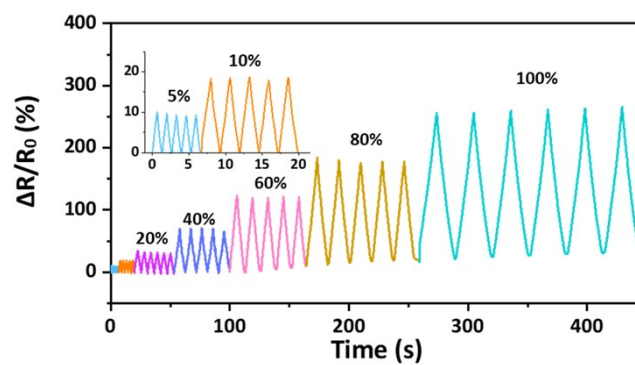

**Fig. S15.** The resistive signal of a notched pVB@2Sn gel sensor under different applied strains ranging from 5% to 100%.



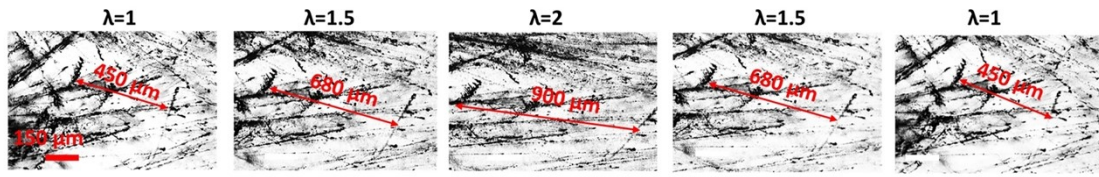

**Fig. S16.** Polarizing microscopic images to show the morphology change of dendrite network under loading and unloading states.

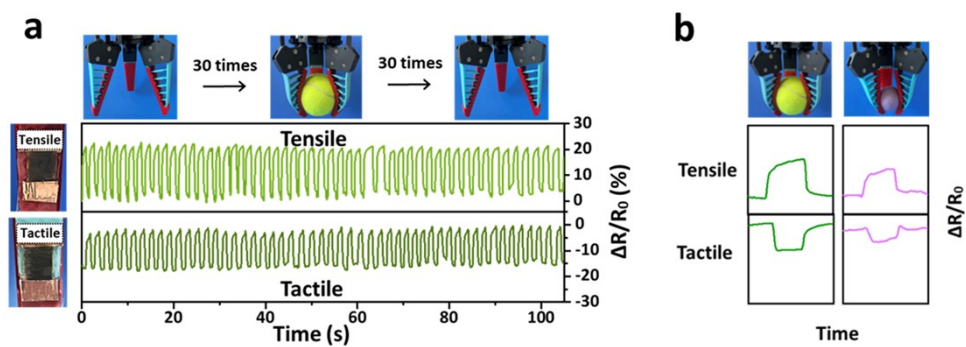

**Fig. S17.** (a) Two channel mode sensing the grasping and releasing action of mechanical claw by using pVB@2Sn sensor. (b) The two-channel signals of the sensor during grasping items with different sizes.

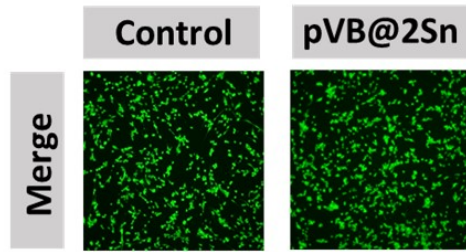

**Fig. S18.** The biocompatibility of pVB@2Sn gel.

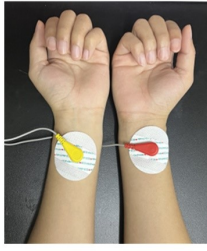

**Fig. S19.** Image of the experimental setup for ECG monitoring.

**Table S1.** Recipe for preparing different hydrogels.

|        | Monomer | Initiator | Crosslinker | Water  |
|--------|---------|-----------|-------------|--------|
| pVB    | 1.22 g  |           |             | 0.97 g |
| pSB    | 1.11 g  | 0.01 g    | 0.003 g     | 1.08 g |
| pAM    | 0.28 g  |           |             | 1.91 g |
| pAPTAC | 1.10 g  |           |             | 1.09 g |
| pAMPS  | 0.83 g  |           |             | 1.23 g |
